# Supplementary material for: Validation of microwave acid digestion, diffusive gradients in thin-film preconcentration and inductively coupled plasma optical emission spectrometry methodology for the determination of REEs in natural zeolites
Source: Royal Society of Chemistry journal article supplement (doi:10.1039/d4ay00745j), 2024-01-01
Supplement: d4ay00745j1.pdf [file d4ay00745j1.pdf]

1 **Supporting information**

2

3 **Validation of microwave acid digestion, diffusive gradients in thin-films preconcentration**  
4 **and inductively coupled plasma optical emission spectrometry methodology for**  
5 **determination of REEs in natural zeolites**

6

7

8 Marin Senila,<sup>\*a</sup> Erika Andrea Levei,<sup>a</sup> Lacrimioara Senila<sup>a</sup> and Oana Cadar<sup>a</sup>

9

10 <sup>a</sup> National Institute for Research and Development Optoelectronics INOE 2000, Research

11 Institute for Analytical Instrumentation, Donath 67, 400293 Cluj-Napoca, Romania, E-mail:

12 marin.senila@icia.ro; Tel.: +40 264 420 590;

13

14 \*Corresponding Author: [marin.senila@icia.ro](mailto:marin.senila@icia.ro)

15

16 **Content**

17 **Figure S1.** XRD patterns of (a) Rupea, (b) Chilioara and (c) Macicasu zeolite samples

18 **Figure S2.** Calibration curves for REEs determination by ICP-OES

19 **Table S1.** Diffusion coefficients for REE used for DGT calculation.

20

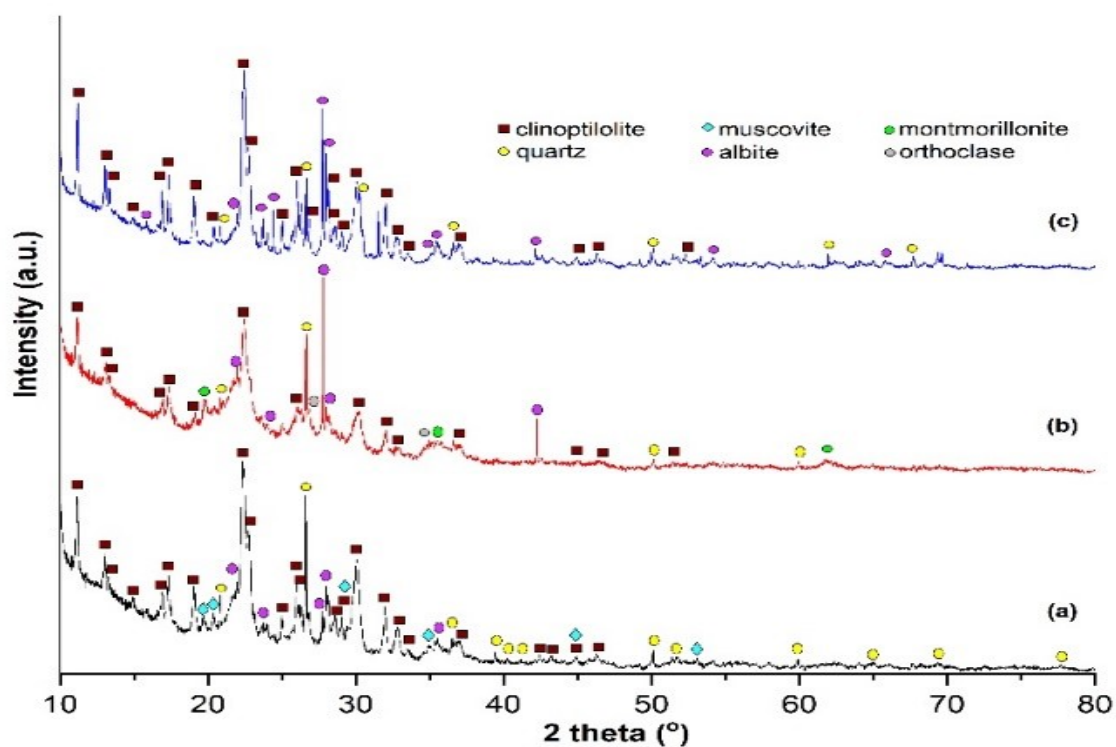

21

22 **Figure S1.** XRD patterns of (a) Rupea, (b) Chilioara and (c) Macicasu zeolite samples.

23 According to the XRD analysis, the Racos, Chilioara and Macicasu zeolite samples contain

24 clinoptilolite (00-047-1870/ 01-080-1557/ 00-047-1870) as the main mineral, attended by

25 albite (00-010-0393/ 00-020-0548/ 01-076-0926), quartz (01-070-7344/ 01-079-1910/01-

26 079-1910), muscovite (00-007-0025/-/ -), montmorillonite (-/ 00-058-2038/ -), and orthoclase

27 (-/ 00-031-0966/ -).

28

29

30

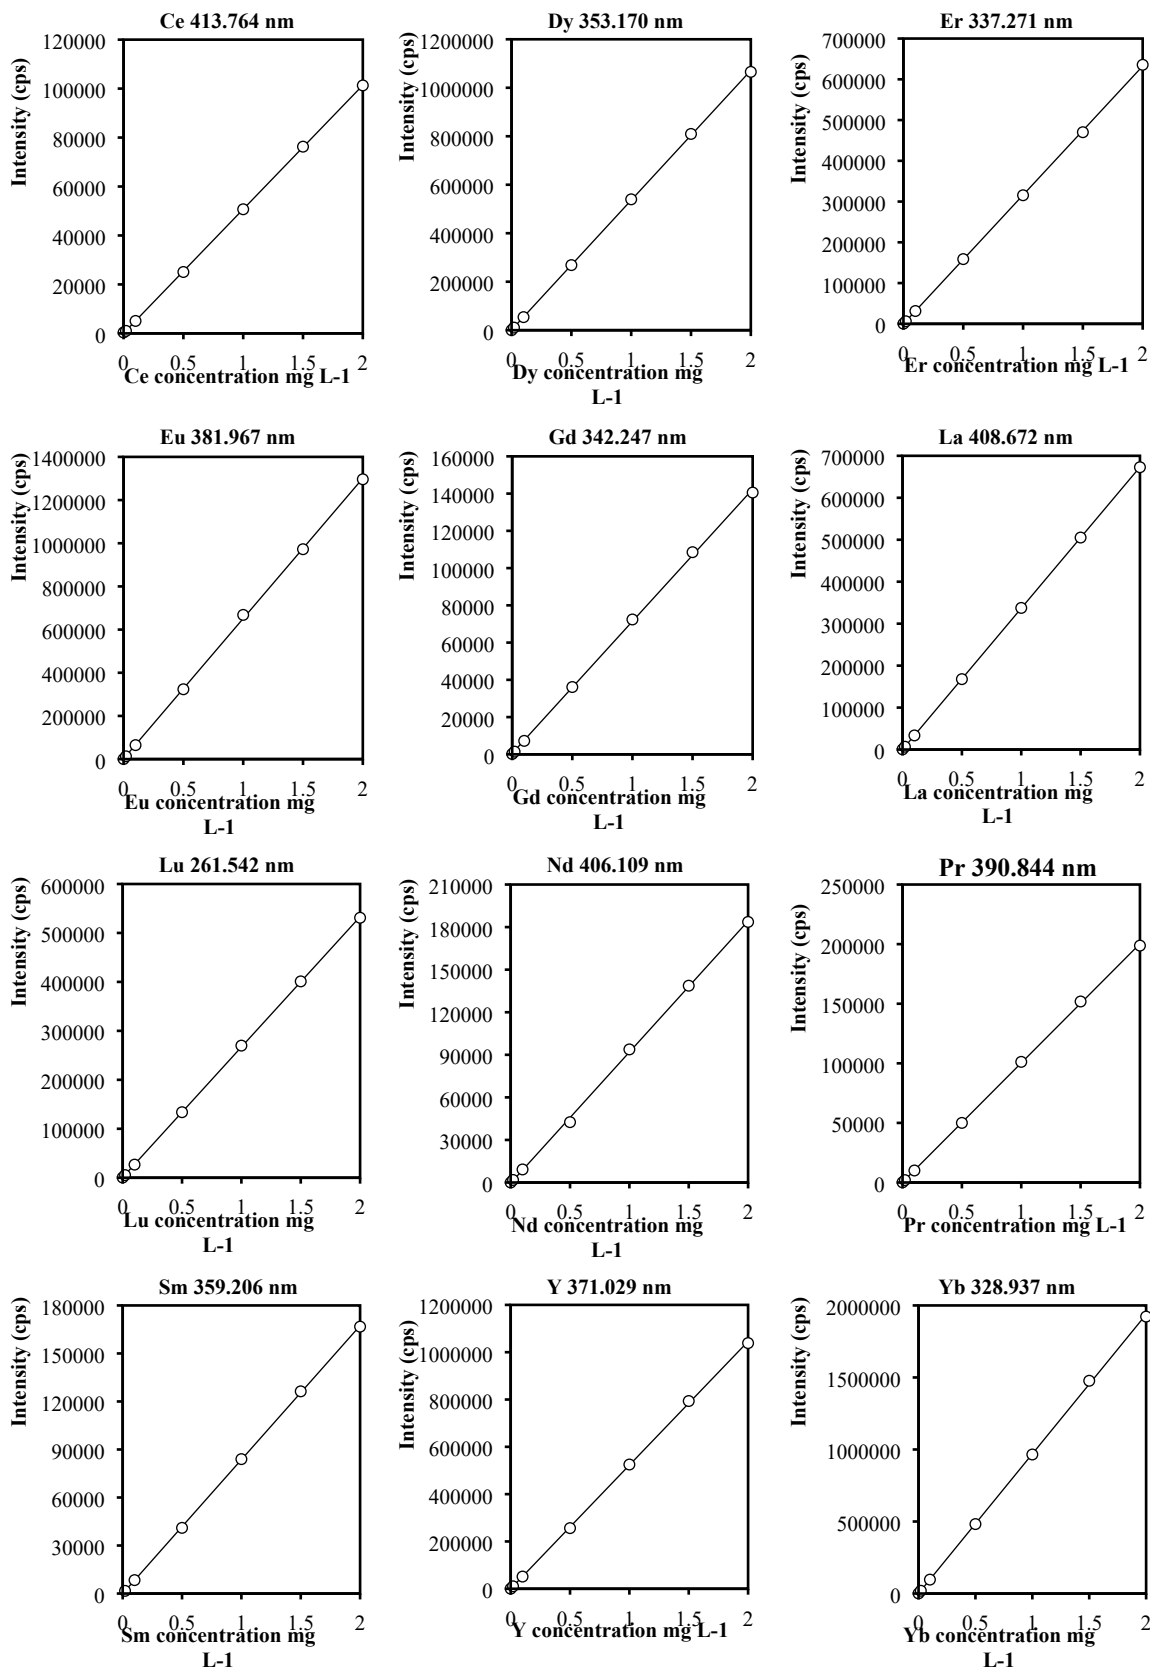

**Figure S2.** Calibration curves for REEs determination by ICP-OES over the 0 – 2 mg L<sup>-1</sup> concentration range

31 **Table S1.** Diffusion coefficients for REEs used for DGT calculation (at 25 °C).<sup>1,2</sup>

| REE | Diffusion coefficient<br>( $\times 10^{-6} \text{ cm}^2\text{s}^{-1}$ ) | REE | Diffusion coefficient<br>( $\times 10^{-6} \text{ cm}^2\text{s}^{-1}$ ) |
|-----|-------------------------------------------------------------------------|-----|-------------------------------------------------------------------------|
| Ce  | 6.19                                                                    | Lu  | 4.97                                                                    |
| Dy  | 5.82                                                                    | Nd  | 6.16                                                                    |
| Er  | 5.85                                                                    | Pr  | 6.18                                                                    |
| Eu  | 6.02                                                                    | Sm  | 6.08                                                                    |
| Gd  | 5.97                                                                    | Y   | 4.82                                                                    |
| La  | 6.19                                                                    | Yb  | 5.82                                                                    |

32

33

34

35 **References**

36 [1] O.A. Garmo, O. Royset, E. Steinnes, T.P. Flaten, *Anal. Chem.* 2003, **75**, 3573–3580.

37 <https://doi.org/10.1021/ac026374n>.

38 [2] J. Huang, J. Hills, P.R. Teasdale, J.G. Panther, F. Wang, D.T. Welsh, *Talanta* 2021, **230**,

39 122315. <https://doi.org/10.1016/j.talanta.2021.122315>.
